# Supplementary material for: On the characterization and performance of highly dispersed TiO2 nanoparticles onto BEA zeolite in the continuous gas-phase photooxidation of ethylene
Source: Royal Society of Chemistry journal article supplement (doi:10.1039/d4lf00286e), 2024-10-09
Supplement: d4lf00286e14.pdf [file d4lf00286e14.pdf]

SUPPLEMENTARY INFORMATION

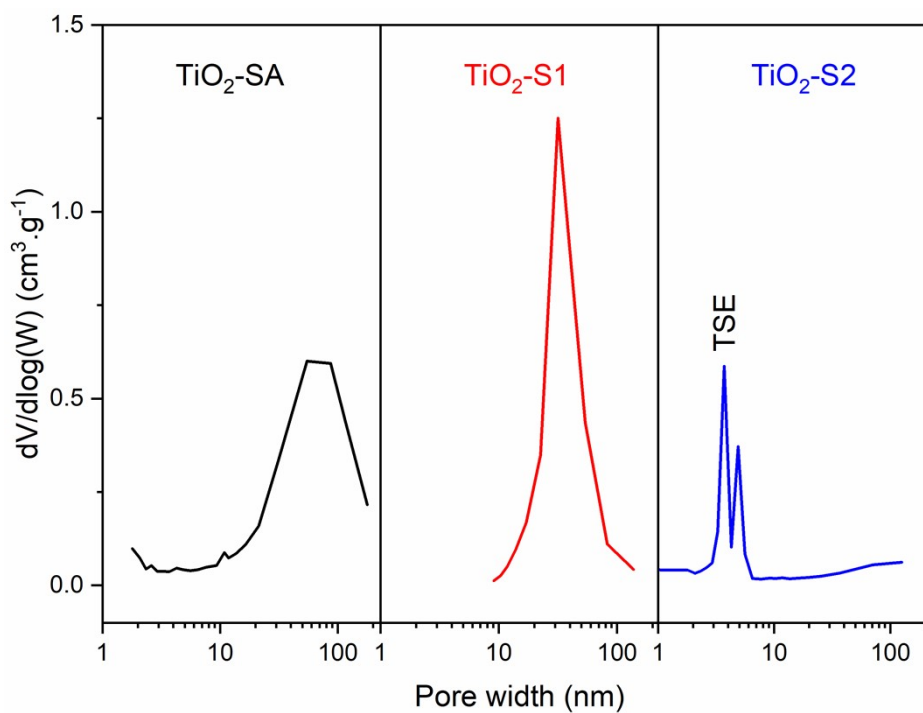

Figure S1. Pore size distribution (PSD) curves of bulk  $\text{TiO}_2$  samples (obtained from BJH method, desorption branch).

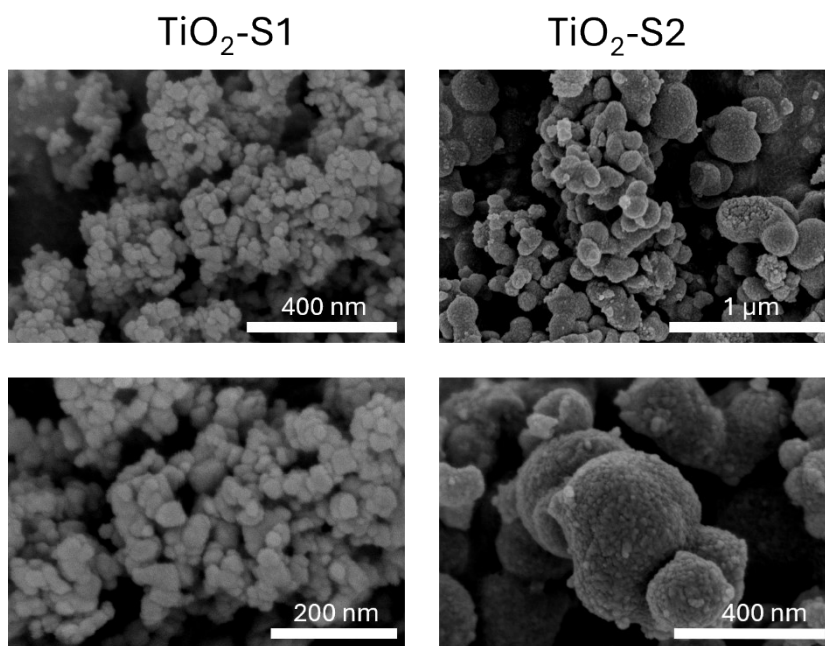

Figure S2. SEM images of bulk  $\text{TiO}_2$  samples with different magnifications: left,  $\text{TiO}_2$ -S1 and right,  $\text{TiO}_2$ -S2.

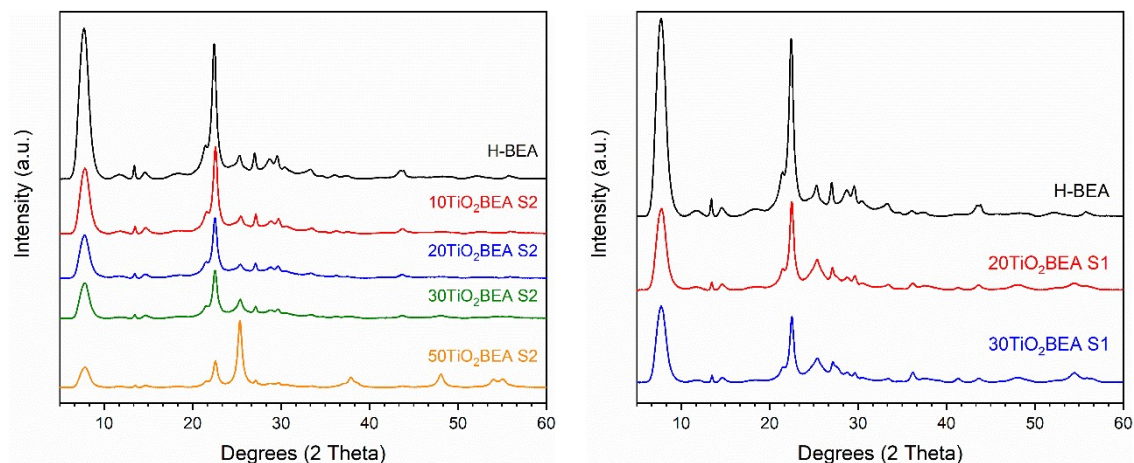

Figure S3. PXRD patterns of (left) S2 series and (right) S1 series composites.

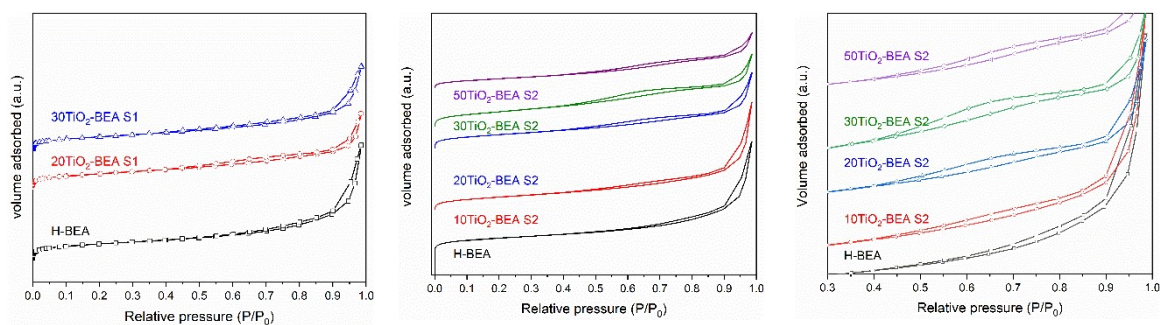

Figure S4.  $N_2$  isotherms at 77 K for the different composite materials: (left) raw HBEA support and  $TiO_2$ -BEA S1 series; (middle, right)  $TiO_2$ -BEA S2 series.

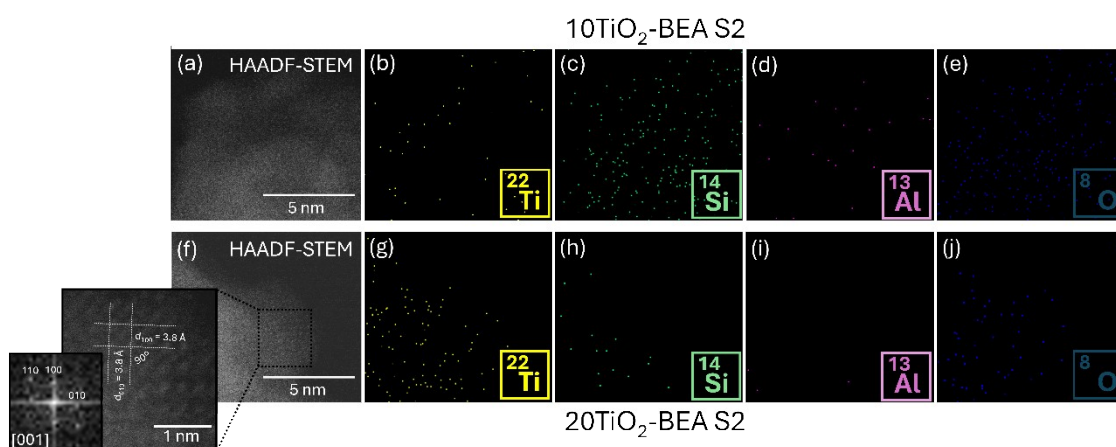

Figure S5. (a) HAADF-STEM image of the  $10TiO_2$ -BEA S2 sample together with the EDS maps of (b) Ti, (c) Si, (d) Al, and (e) O. (f) HAADF-STEM image of the  $20TiO_2$ -BEA S2 sample, where the insets show a magnified image of the  $TiO_2$  nanocrystal with its FFT pattern. The EDS maps of (g) Ti, (h) Si, (i) Al, and (j) O are also presented.

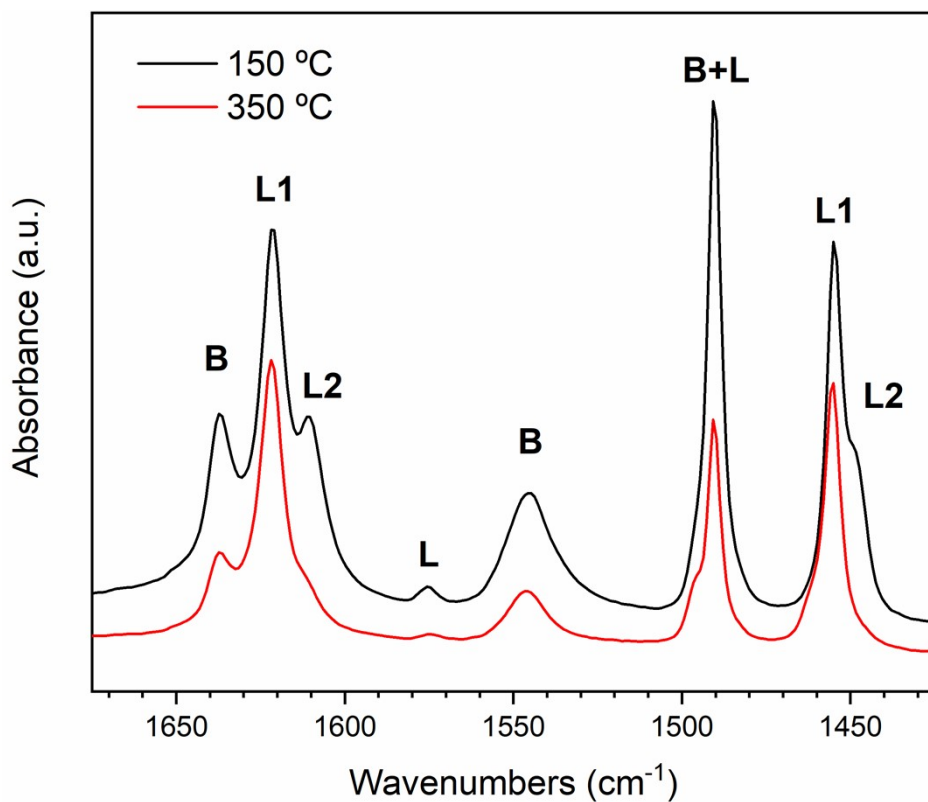

Figure S6. Infrared difference spectra of sample 20TiO<sub>2</sub>-BEA S2 showing the bands of pyridine at 150 and 350 °C (B: band of pyridine adsorbed onto Brønsted acid sites; L1 and L2: band of pyridine adsorbed onto Lewis acid sites, respectively Al and Ti species).

Table S1. Band gap values of all the composites determined by the Tauc plot indirect method.

| Sample                      | Band gap (eV) |
|-----------------------------|---------------|
| TiO <sub>2</sub> SA         | 3.33          |
| TiO <sub>2</sub> bulk S1    | 3.18          |
| 20 TiO <sub>2</sub> -BEA S1 | 3.42          |
| 30TiO <sub>2</sub> -BEA S1  | 3.29          |
| TiO <sub>2</sub> bulk S2    | 3.24          |
| 10TiO <sub>2</sub> -BEA S2  | 3.49          |
| 20TiO <sub>2</sub> -BEA S2  | 3.43          |
| 30TiO <sub>2</sub> -BEA S2  | 3.37          |
| 50TiO <sub>2</sub> -BEA S2  | 3.29          |

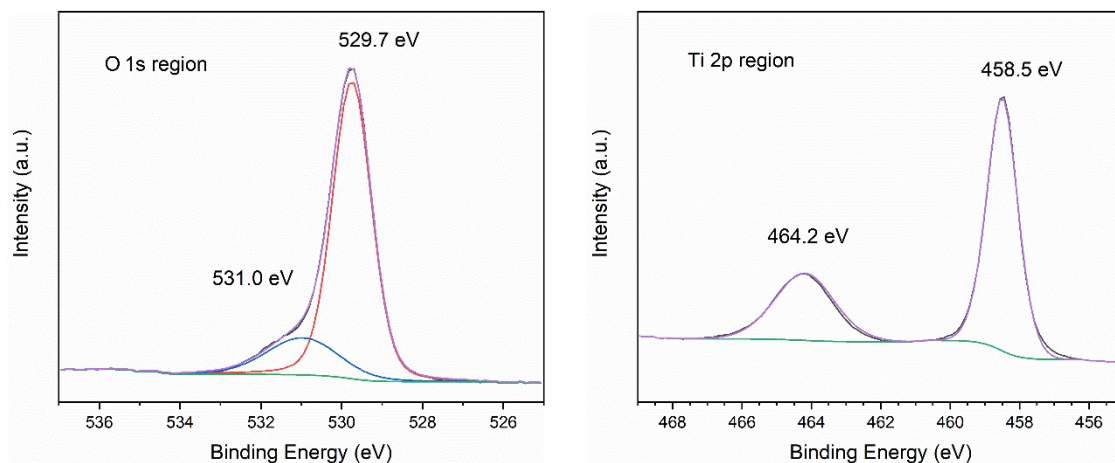

Figure S7. XPS spectra of bulk  $\text{TiO}_2$  reference ( $\text{TiO}_2\text{-SA}$ ): (left) O1s region; (right) Ti2p region.

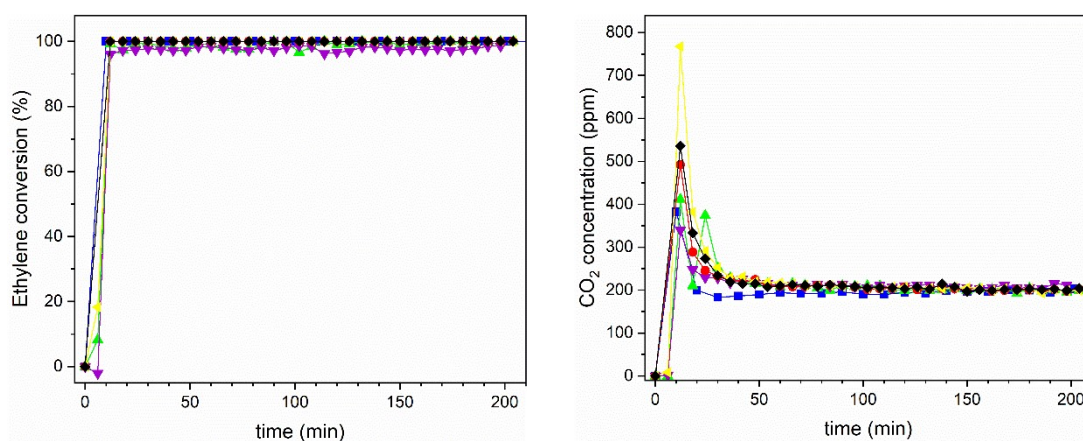

Figure S8. Ethylene photooxidation experiments under UV-Vis light for 10 $\text{TiO}_2\text{-BEA S2}$  (◆), 20 $\text{TiO}_2\text{-BEA S2}$  (■), 30 $\text{TiO}_2\text{-BEA S2}$  (●), 50 $\text{TiO}_2\text{-BEA S2}$  (◀); 20 $\text{TiO}_2\text{-BEA S1}$  (▲) and 30 $\text{TiO}_2\text{-BEA S1}$  (▼): (left) ethylene conversion; (right)  $\text{CO}_2$  concentration (experimental conditions  $\text{C}_2\text{H}_4$  100 ppm,  $25 \text{ cm}^3 \cdot \text{min}^{-1}$ , 0.45g).

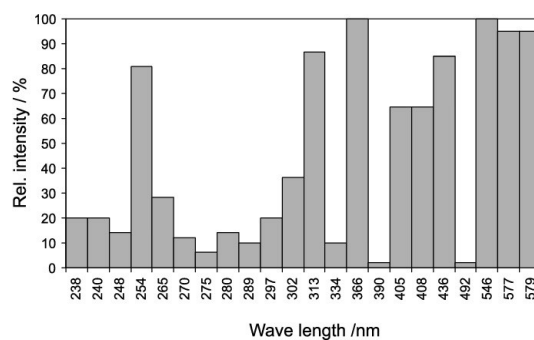

Figure S9 – Mercury lamp: relative intensity as a function of wavelength.
