# Supplementary figures and images for: On the characterization and performance of highly dispersed TiO2 nanoparticles onto BEA zeolite in the continuous gas-phase photooxidation of ethylene
Source: Royal Society of Chemistry journal article supplement (doi:10.1039/d4lf00286e), 2024-10-09

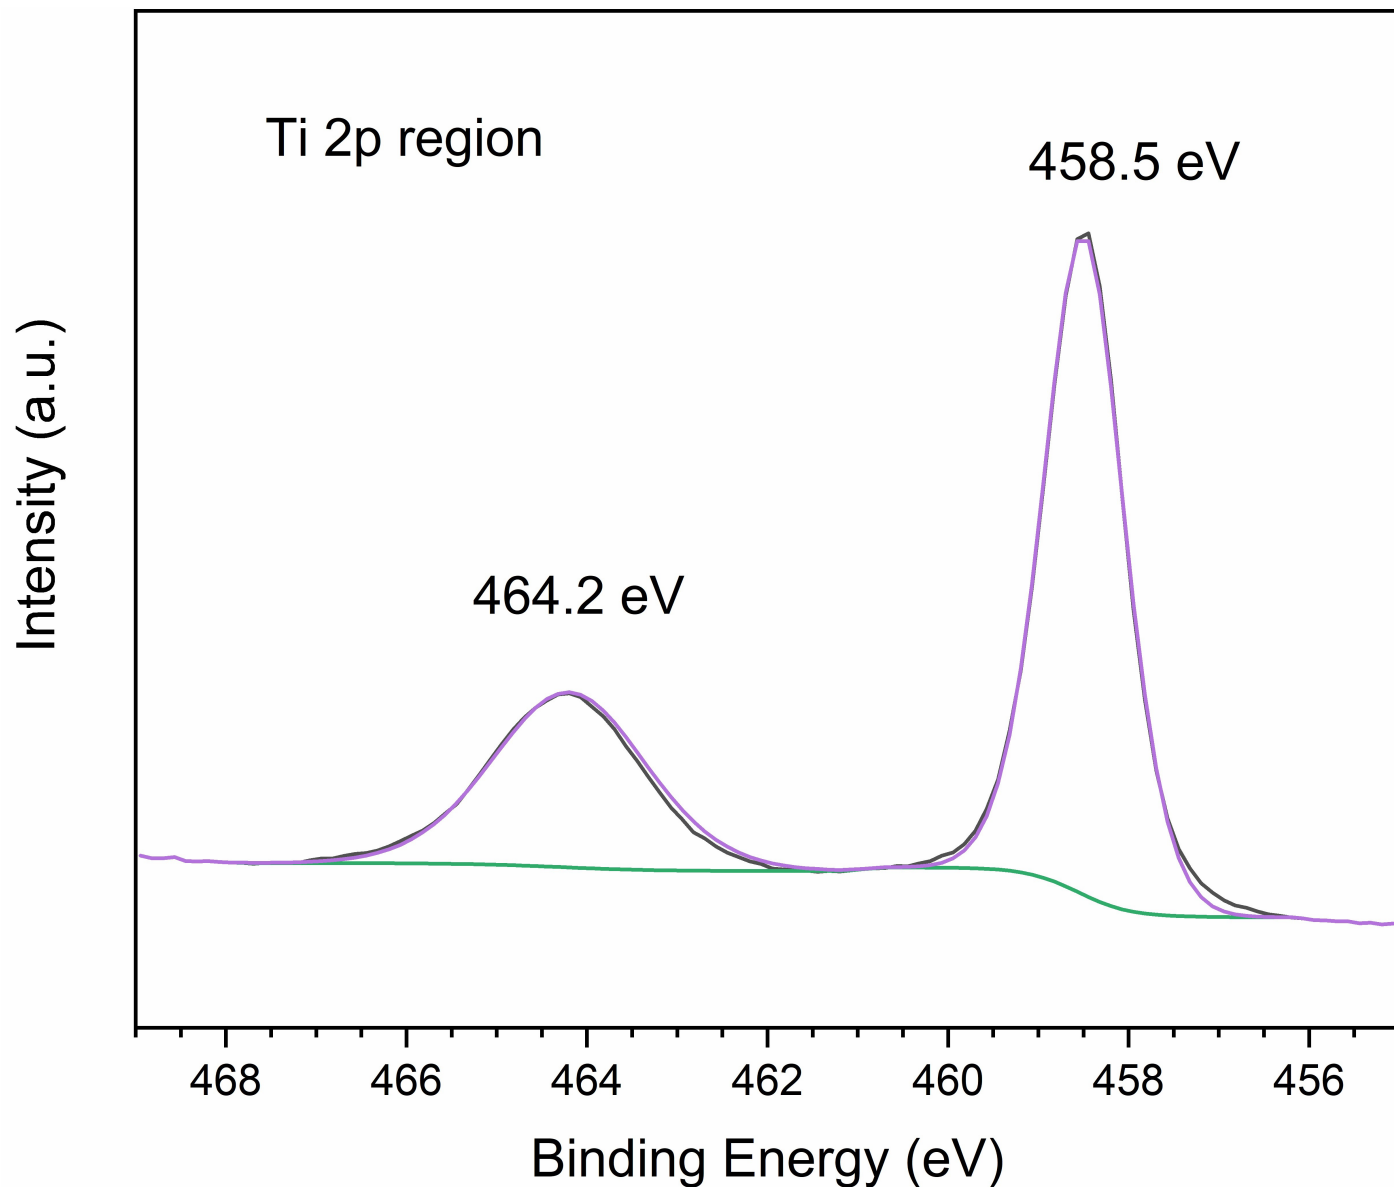

Supplement: d4lf00286e10.pdf [file d4lf00286e10.pdf]

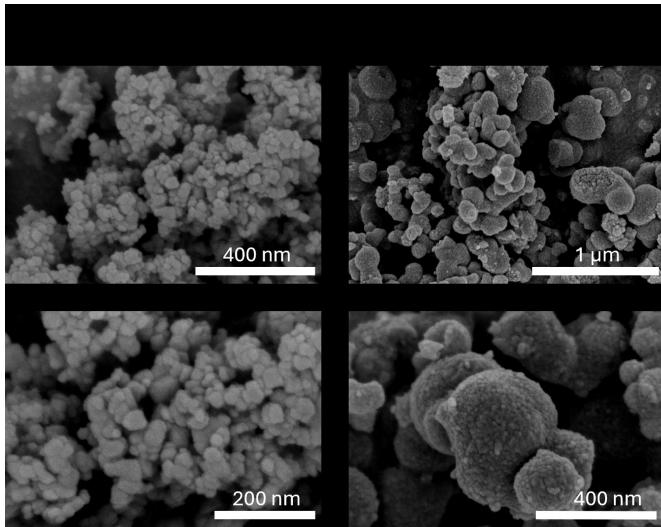

Supplement: d4lf00286e2.pdf [file d4lf00286e2.pdf]

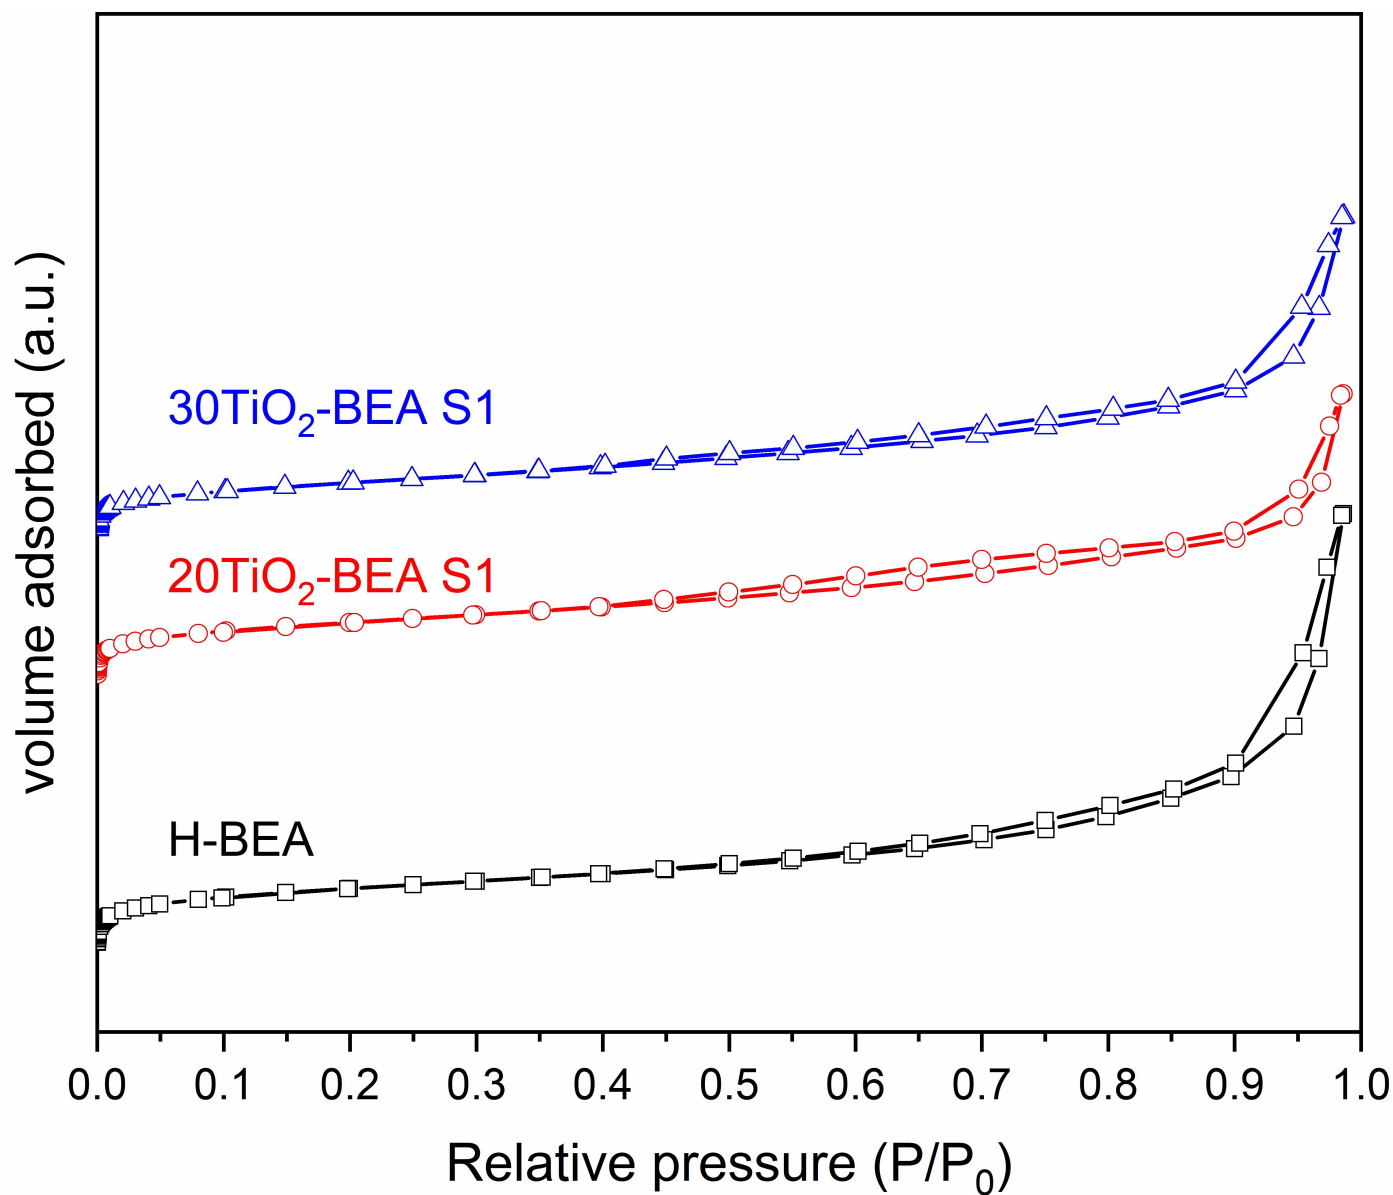

Supplement: d4lf00286e5.pdf [file d4lf00286e5.pdf]

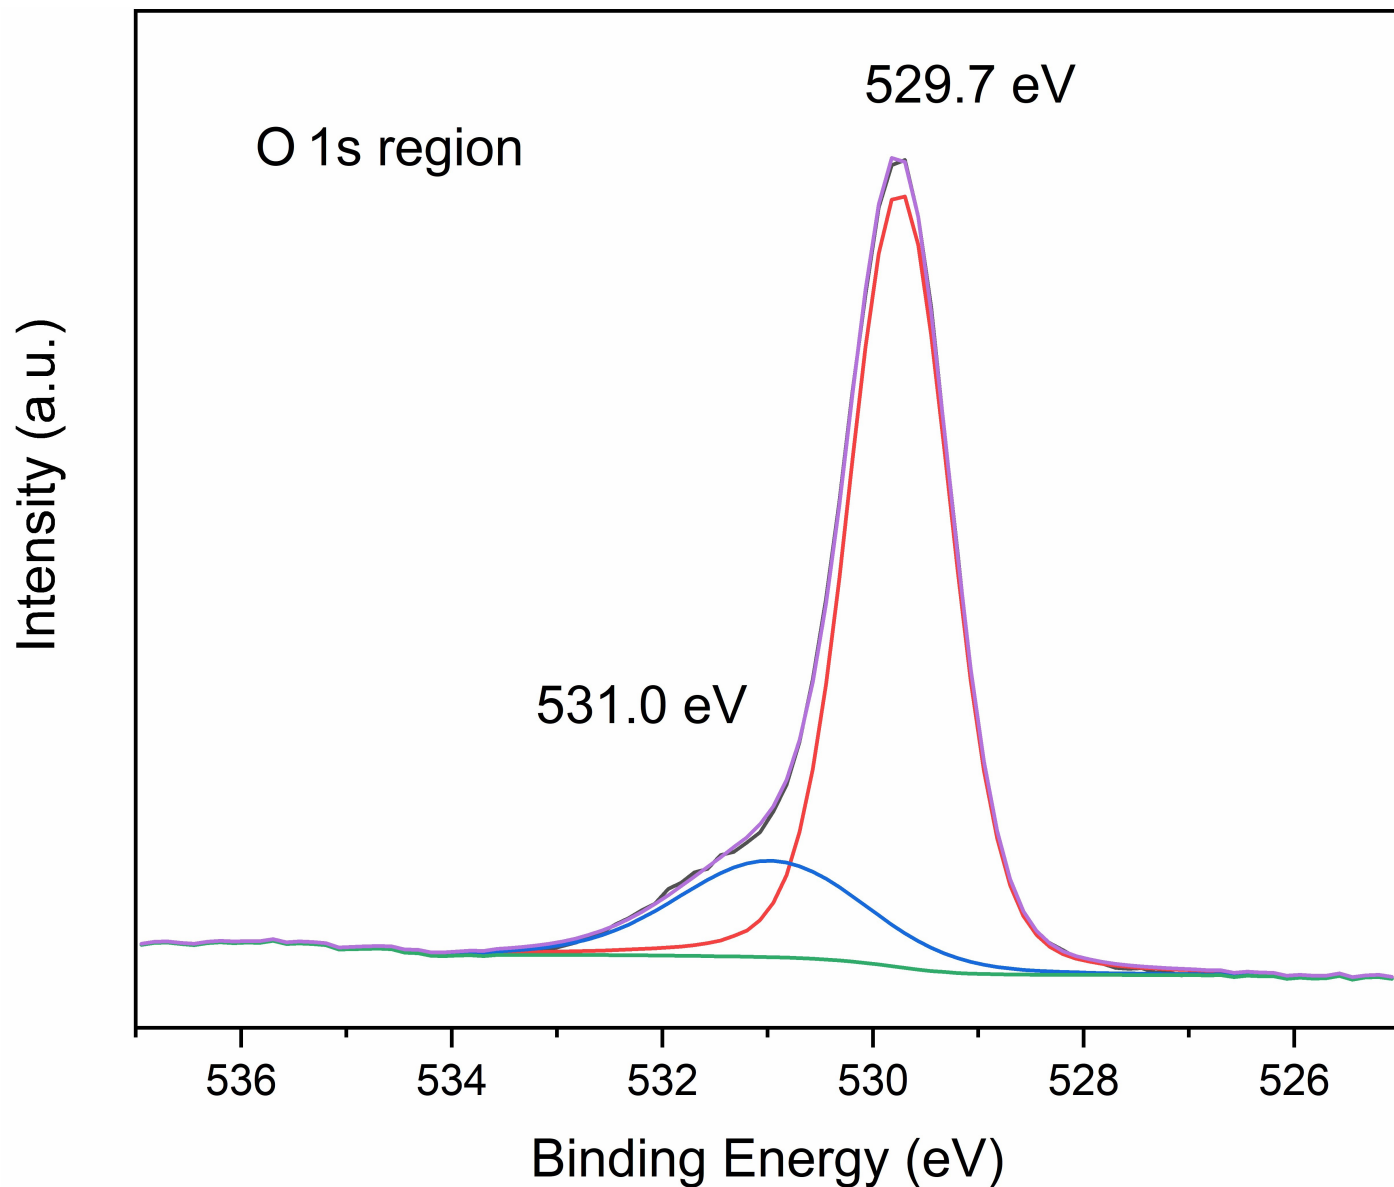

Supplement: d4lf00286e9.pdf [file d4lf00286e9.pdf]
